# Supplementary material for: Elimination of persistent emerging micropollutants in a suspended-bed photocatalytic reactor: influence of operating conditions and combination with aerobic biological treatment
Source: Royal Society of Chemistry journal article supplement (doi:10.1039/c6pp00319b), 2016-10-24
Supplement: c6pp00319b1.pdf [file c6pp00319b1.pdf]

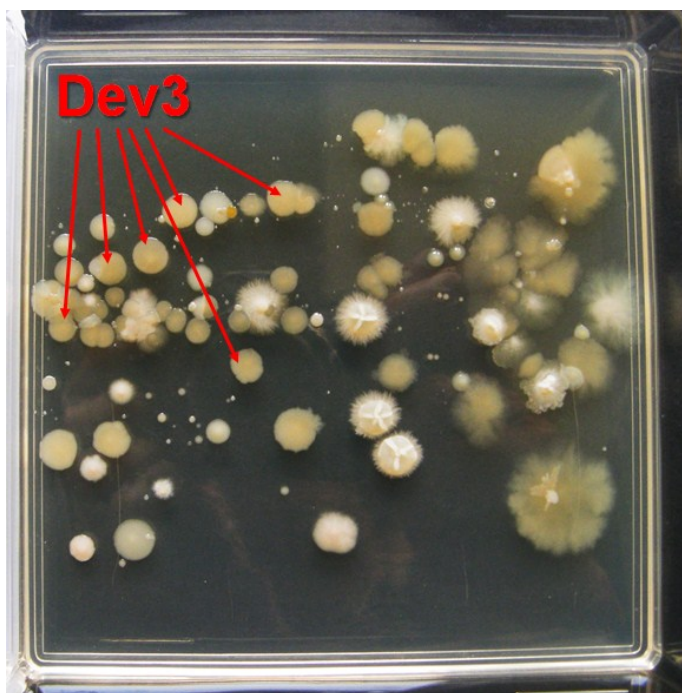

**Fig. S1** The dominant bacterial strain (named as Dev3) in activated sludge of a pilot sewage water treatment unit (some of the strain Dev3 colonies are indicated by red arrows).
